# Supplementary material for: Application of the Ridden Horse Pain Ethogram to Horses Competing at the Hickstead-Rotterdam Grand Prix Challenge and the British Dressage Grand Prix National Championship 2020 and Comparison with World Cup Grand Prix Competitions
Source: MDPI journal article supplement (doi:10.3390/ani11061820), 2021-06-18
Supplement: s1 [file s1]

## Supplementary items

Supplementary information 1: British Dressage Qualifications for the Grand Prix National Championships

Supplementary information 2: The Fédération Equestre Internationale Grand Prix Dressage test.

Supplementary information 3: Table S1. Summary of the Ridden Horse Pain Ethogram (adapted from Dyson *et al.* 2018) [5].

Supplementary information 4: Table S2. Comparison of the frequency of occurrence (percentage) of the 24 behaviours of the Ridden Horse Pain Ethogram among horses warming-up for the dressage phase of 5\* three-day events (TDE) (n=137) [9] and Grand Prix dressage horses in competition in the Hickstead-Rotterdam Challenge (n=38) and the British Dressage Grand Prix National Championship (n=26).

### Supplementary information 1

#### British Dressage Qualifications for the Grand Prix National Championships

Places for the Grand Prix Championships will be allocated as follows:

- Automatic qualification for the selected combinations for that year's Senior European or World Championships or Olympic Games
- Automatic qualification for the winners of each Premier League Grand Prix Gold class (one per Premier League) (excluding Grand Prix Special or Freestyle) scoring 65% or above.
- Qualification for the three combinations who have achieved the highest scores above 65% in UK based or overseas CDI Grand Prix classes (excluding under 25 Grand Prix, Grand Prix Special or Freestyle).
- Qualification for the three horses who achieve the highest average score above 65% from three Premier League or High Profile Show Grand Prix and under 25 Grand Prix classes, excluding Grand Prix Special or Freestyle. At least one score must come from a Premier League.

If the places are not filled by the above method, additional places will be filled by taking the next highest score from either the CDI list or the list of the highest average scores from three Premier League or High Profile Show Grand Prix classes.

## Supplementary information 2.

### The Fédération Equestre Internationale Grand Prix Dressage test.

|    | Markers at which movement performed | Instructions                                                                                           | Score | Coefficient | Directions to judges                                                                                                    |
|----|-------------------------------------|--------------------------------------------------------------------------------------------------------|-------|-------------|-------------------------------------------------------------------------------------------------------------------------|
| 1  | A<br>X<br>XC                        | Enter in collected canter<br>Halt - immobility - salute<br>Proceed in collected trot<br>Collected trot | 10    |             | Quality of paces, halt, and transitions. Straightness. Contact and poll.                                                |
| 2  | C<br>HXF<br>FAK                     | Track to the left<br>Extended trot<br>Collected trot                                                   | 10    |             | Regularity, elasticity, balance, of hindquarters, overtrack. Lengthening of frame. Both transitions.                    |
| 3  | KB                                  | Half-pass to the right                                                                                 | 10    | 2           | Regularity and quality of trot, uniform bend, collection, balance, fluency, crossing of legs.                           |
| 4  | BH<br>HC                            | Half-pass to the left<br>Collected trot                                                                | 10    | 2           | Regularity and quality of trot, uniform bend, collection, balance, fluency, crossing of legs.                           |
| 5  | C                                   | Halt - immobility<br>Rein back 5 steps and immediately proceed in collected trot                       | 10    |             | Quality of halt and transitions. Throughness, fluency, straightness. Accuracy in number of diagonal steps.              |
| 6  | MV                                  | Extended trot                                                                                          | 10    |             | Regularity, elasticity, balance, energy of hindquarters, overtrack. Lengthening of frame. Transition to extended trot.  |
| 7  | VKD                                 | Passage                                                                                                | 10    |             | Regularity, cadence, collection, self-carriage, balance, activity, elasticity of back and steps. Transition to passage. |
| 8  | D                                   | Piaffe 12 to 15 steps                                                                                  | 10    | 2           | Regularity, taking weight, self-carriage, activity, elasticity of back and steps. Specific number of diagonal steps.    |
| 9  | D                                   | Transitions passage - piaffe - passage                                                                 | 10    |             | Maintenance of rhythm, collection, self-carriage, balance, fluency, straightness. Precise execution.                    |
| 10 | DFP                                 | Passage                                                                                                | 10    |             | Regularity, cadence, collection, self-carriage, balance, activity, elasticity of back and steps.                        |
| 11 | PH                                  | Extended walk                                                                                          | 10    | 2           | Regularity, suppleness of back, activity, overtrack, freedom of shoulder, stretching to the bit. Transition into walk.  |
| 12 | HCM                                 | Collected walk                                                                                         | 10    | 2           | Regularity, suppleness of back, activity, shortening and heightening of steps, self-carriage.                           |
| 13 |                                     | Proceed in passage                                                                                     | 10    |             | Fluency, promptness,                                                                                                    |

|    |                              |                                                                                                                                                                                                                                                                                                             |    |   |                                                                                                                                                   |
|----|------------------------------|-------------------------------------------------------------------------------------------------------------------------------------------------------------------------------------------------------------------------------------------------------------------------------------------------------------|----|---|---------------------------------------------------------------------------------------------------------------------------------------------------|
|    |                              | Transition collected<br>walk - passage                                                                                                                                                                                                                                                                      |    |   | self-carriage, balance,<br>straightness.                                                                                                          |
| 14 | MRI                          | Passage                                                                                                                                                                                                                                                                                                     | 10 |   | Regularity, cadence, collection,<br>self-carriage, balance, activity,<br>elasticity of back and steps.                                            |
| 15 | I                            | Piaffe 12 to 15<br>steps                                                                                                                                                                                                                                                                                    | 10 | 2 | Regularity, taking weight, self-<br>carriage, activity, elasticity of<br>back and steps. Specific number<br>of diagonal steps.                    |
| 16 | I                            | Transitions<br>passage - piaffe -<br>passage                                                                                                                                                                                                                                                                | 10 |   | Maintenance of rhythm,<br>collection, self-carriage, balance,<br>fluency, straightness.<br>Precise execution.                                     |
| 17 | ISE                          | Passage                                                                                                                                                                                                                                                                                                     | 10 |   | Regularity, cadence, collection,<br>self-carriage, balance, activity,<br>elasticity of back and steps.                                            |
| 18 | E<br>EKAF                    | Proceed in<br>collected canter<br>left<br>Collected canter                                                                                                                                                                                                                                                  | 10 |   | Precise execution and fluency of<br>transition.<br>Quality of canter.                                                                             |
| 19 | FXH<br>HCM                   | On the diagonal 9<br>flying changes<br>of leg every 2nd<br>stride<br>Collected canter                                                                                                                                                                                                                       | 10 |   | Correctness, balance, fluency,<br>uphill tendency, straightness.<br>Quality of canter before and<br>after.                                        |
| 20 | MXK                          | Extended canter                                                                                                                                                                                                                                                                                             | 10 |   | Quality of canter, impulsion,<br>lengthening of strides and<br>frame. Balance, uphill tendency,<br>straightness.                                  |
| 21 | K<br>KA                      | Collected canter<br>and flying change<br>of leg<br>Collected canter                                                                                                                                                                                                                                         | 10 |   | Quality of flying change on<br>diagonal.<br>Precise, smooth execution of<br>transition.                                                           |
| 22 | A<br>Between D & G<br>G<br>C | Down the centre<br>line<br>5 half-passes to<br>either side of<br>centre line with<br>flying change of<br>leg at each change<br>of direction, the<br>first half-pass to<br>the left and the<br>last to the left of 3<br>strides, the others<br>of 6 strides<br>Flying change of<br>leg<br>Track to the right | 10 | 2 | Quality of canter.<br>Uniform bend, collection,<br>balance, fluency from side to<br>side.<br>Symmetrical execution.<br>Quality of flying changes. |
| 23 | MXK<br>KA                    | On the diagonal<br>15 flying changes<br>of leg every stride<br>Collected canter                                                                                                                                                                                                                             | 10 | 2 | Correctness, balance, fluency,<br>uphill tendency, straightness.<br>Quality of canter before and<br>after.                                        |

|    |               |                                                                     |    |   |                                                                                                                                              |
|----|---------------|---------------------------------------------------------------------|----|---|----------------------------------------------------------------------------------------------------------------------------------------------|
| 24 | A<br>L        | Down the centre<br>line<br>Pirouette to the<br>left                 | 10 | 2 | Collection, self-carriage,<br>balance, size, flexion and<br>bend. Correct number of<br>strides (6-8). Quality of<br>canter before and after. |
| 25 | X             | Flying change of<br>leg                                             | 10 |   | Correctness, balance,<br>fluency, uphill tendency,<br>straightness.<br>Quality of<br>canter before and after.                                |
| 26 | I<br>C<br>CM  | Pirouette to the<br>right<br>Track to the right<br>Collected canter | 10 | 2 | Collection, self-carriage, balance,<br>size, flexion and bend. Correct<br>number of strides (6-8). Quality<br>of canter before and after.    |
| 27 | M<br>MR       | Collected trot<br>Collected trot                                    | 10 |   | Fluency; precise, smooth<br>execution of transition.<br>Collection.                                                                          |
| 28 | RK<br>K<br>KA | Extended trot<br>Collected trot<br>Collected trot                   | 10 |   | Regularity, elasticity,<br>balance, energy of<br>hindquarters, overtrack.<br>Lengthening of frame.<br>Both transitions. Collection.          |
| 29 | A<br>DX       | Down the centre<br>line<br>Passage                                  | 10 |   | Regularity, cadence, collection,<br>self-carriage, balance, activity,<br>elasticity of back and steps.<br>Transition to passage.             |
| 30 | X             | Piaffe 12 to 15<br>steps                                            | 10 | 2 | Regularity, taking weight,<br>self-carriage, activity,<br>elasticity of back and steps.<br>Specific number of diagonal<br>steps.             |
| 31 | X             | Transitions<br>passage - piaffe -<br>passage                        | 10 |   | Maintenance of rhythm,<br>collection, self-carriage,<br>balance, fluency,<br>straightness.<br>Precise execution.                             |
| 32 | XG            | Passage                                                             | 10 |   | Regularity, cadence,<br>collection, self-carriage,<br>balance, activity, elasticity<br>of back and steps.                                    |
| 33 | G             | Halt - immobility -<br>salute                                       | 10 |   | Quality of halt and<br>transition. Straightness.<br>Contact and poll.                                                                        |

### Supplementary information 3

Table S1. Summary of the Ridden Horse Pain Ethogram (adapted from Dyson *et al.* 2018) [5].

### Definitions of the 24 behaviours

|                                                                             |
|-----------------------------------------------------------------------------|
| 1. Repeated changes of head position (up/down), not in rhythm with the trot |
| 2. Head tilted or tilting repeatedly                                        |

|                                                                                                                                          |
|------------------------------------------------------------------------------------------------------------------------------------------|
| 3. Head in front of vertical ( $\geq 30^\circ$ ) for $\geq 10$ s                                                                         |
| 4. Head behind vertical ( $\geq 10^\circ$ ) for $\geq 10$ s                                                                              |
| 5. Head position changes regularly, tossed or twisted from side to side, corrected constantly                                            |
| 6. Ears rotated back behind vertical (both or one only) for $\geq 5$ s; repeatedly lay flat                                              |
| 7. Eye lids closed or half closed for 2-5 s; frequent blinking                                                                           |
| 8. Sclera exposed repeatedly                                                                                                             |
| 9. Intense stare (glazed expression, 'zoned out') for $\geq 5$ s                                                                         |
| 10. Mouth opening $\pm$ shutting repeatedly with separation of teeth, for $\geq 10$ s                                                    |
| 11. Tongue exposed, protruding or hanging out, and/or moving in and out repeatedly                                                       |
| 12. Bit pulled through the mouth on one side (left or right), repeatedly                                                                 |
| 13. Tail clamped tightly to middle or held to one side                                                                                   |
| 14. Tail swishing large movements: repeatedly up and down/side to side/ circular; repeatedly during transitions                          |
| 15. A rushed gait (frequency of trot steps $> 40/15$ s); irregular rhythm in trot or canter; repeated changes of speed in trot or canter |
| 16. Gait too slow (frequency of trot steps $< 35/15$ s); passage-like trot                                                               |
| 17. Hindlimbs do not follow tracks of forelimbs but repeatedly deviated to left or right; on 3 tracks in trot or canter                  |
| 18. Canter repeated leg changes change of leg in front and / or behind; repeated strike off wrong leg; disunited                         |
| 19. Spontaneous changes of gait (e.g., breaks from canter to trot or trot to canter)                                                     |
| 20. Stumbles or trips more than once; repeated bilateral hindlimb toe drag                                                               |
| 21. Sudden change of direction, against rider direction; spooking                                                                        |
| 22. Reluctance to move forwards (has to be kicked $\pm$ verbal encouragement), stops spontaneously                                       |
| 23. Rearing (both forelimbs off the ground)                                                                                              |
| 24. Bucking or kicking backwards (one or both hindlimbs)                                                                                 |

Reprinted from J. Vet. Behav.: Clin. Appl. Res., 23, Dyson, S., Berger, J., Ellis, A., Mullard, J., Development of an ethogram for a pain scoring system in ridden horses and its application to determine the presence of musculoskeletal pain, Page 53, Copyright (2018), with permission from Elsevier.

## Supplementary information 4

Table S2. Comparison of the frequency of occurrence (percentage) of the 24 behaviours of the Ridden Horse Pain Ethogram among horses warming-up for the dressage phase of 5\* three-day events (TDE) (n = 137) [9] and Grand Prix dressage horses in competition in the Hickstead-Rotterdam Challenge (n = 38) and the British Dressage Grand Prix National Championship (n = 26). Major differences are highlighted in bold.

| Behaviour                                                                | TDE (%)     | Hickstead-Rotterdam (%) | British Dressage (%) |
|--------------------------------------------------------------------------|-------------|-------------------------|----------------------|
| <b>Mouth open with separation of the teeth for <math>\geq 10</math>s</b> | <b>44.0</b> | 73.7                    | 88.5                 |
| Front of head behind vertical $\geq 10^\circ$ for $\geq 10$ s            | 64.0        | 65.8                    | 88.5                 |
| <b>Intense stare <math>\geq 5</math>s</b>                                | <b>40.0</b> | 55.3                    | <b>76.9</b>          |
| <b>Repeated tail swishing not in synchrony with spur aids</b>            | <b>37.0</b> | 52.6                    | 80.8                 |
| Ears back behind vertical $\geq 5$ s                                     | 19.0        | 39.5                    | 53.9                 |
| Repeated head tilt                                                       | 56.0        | 10.5                    | 30.8                 |
| Spontaneous change of gait                                               | 2.5         | 15.8                    | 19.2                 |
| <b>Repeated stumbling or bilateral hindlimb toe drag</b>                 | <b>0</b>    | 26.3                    | 34.6                 |
| Repeated exposure of the sclera                                          | 22.0        | 7.9                     | 11.5                 |
| Repeated exposure of the tongue                                          | 8.0         | 18.4                    | 19.2                 |
| <b>Head moved from side to side</b>                                      | <b>10.0</b> | <b>5.3</b>              | <b>3.9</b>           |
| Spontaneous change of direction; spooking                                | 2.5         | 2.6                     | 0                    |
| Head movement up and down, not in synchrony with the                     | 5.0         | 5.3                     | 0                    |

|                                                    |            |          |          |
|----------------------------------------------------|------------|----------|----------|
| trot rhythm                                        |            |          |          |
| Bucking                                            | 2.5        | 2.6      | 3.9      |
| Rearing                                            | 0          | 5.3      | 0        |
| Reluctance to go forwards                          | 1.5        | 7.9      | 3.9      |
| Crooked, on 3 tracks                               | 4.5        | 0        | 7.7      |
| Crooked tail, held to one side                     | 26.0       | 13.2     | 23.1     |
| Eyes partially closed 2-5s; repeated blinking      | 0          | 0        | 0        |
| Gait too slow                                      | 1.5        | 0        | 0        |
| Rushed gait                                        | 0          | 0        | 0        |
| <b>Repeated incorrect strike off in canter</b>     | <b>2.0</b> | <b>0</b> | <b>0</b> |
| <b>Bit pulled through to one side</b>              | <b>4.5</b> | <b>0</b> | <b>0</b> |
| Head in front of vertical $\geq 30^\circ \geq 10s$ | 0          | 0        | 0        |
